# Supplementary material
Source: Springer Nature journal article supplement (https://www.springermedizin.de/resource/supplementary/12877_2012_757_MOESM4_ESM.pdf/9440290)

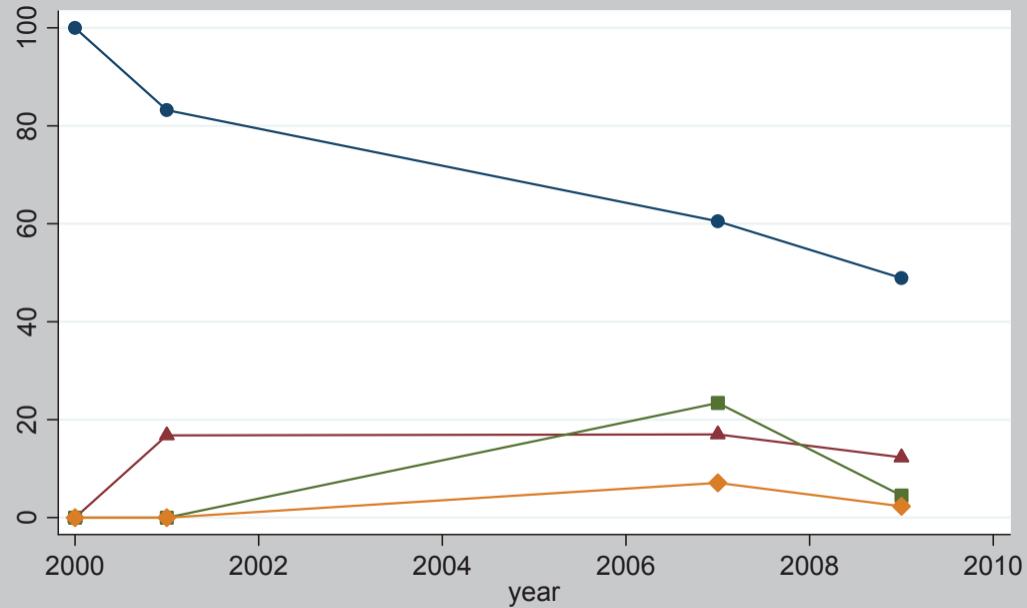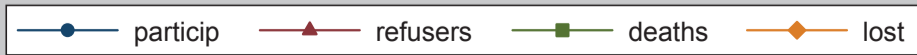

Supplement: MOESM4 [file 9440290]
